# Supplementary material for: The Prevalence of Malaria and Bacteremia Co-Infections among Febrile Patients: A Systematic Review and Meta-Analysis
Source: MDPI journal article supplement (doi:10.3390/tropicalmed7090243), 2022-09-13
Supplement: s1 [file s1]

## Supplementary Figures

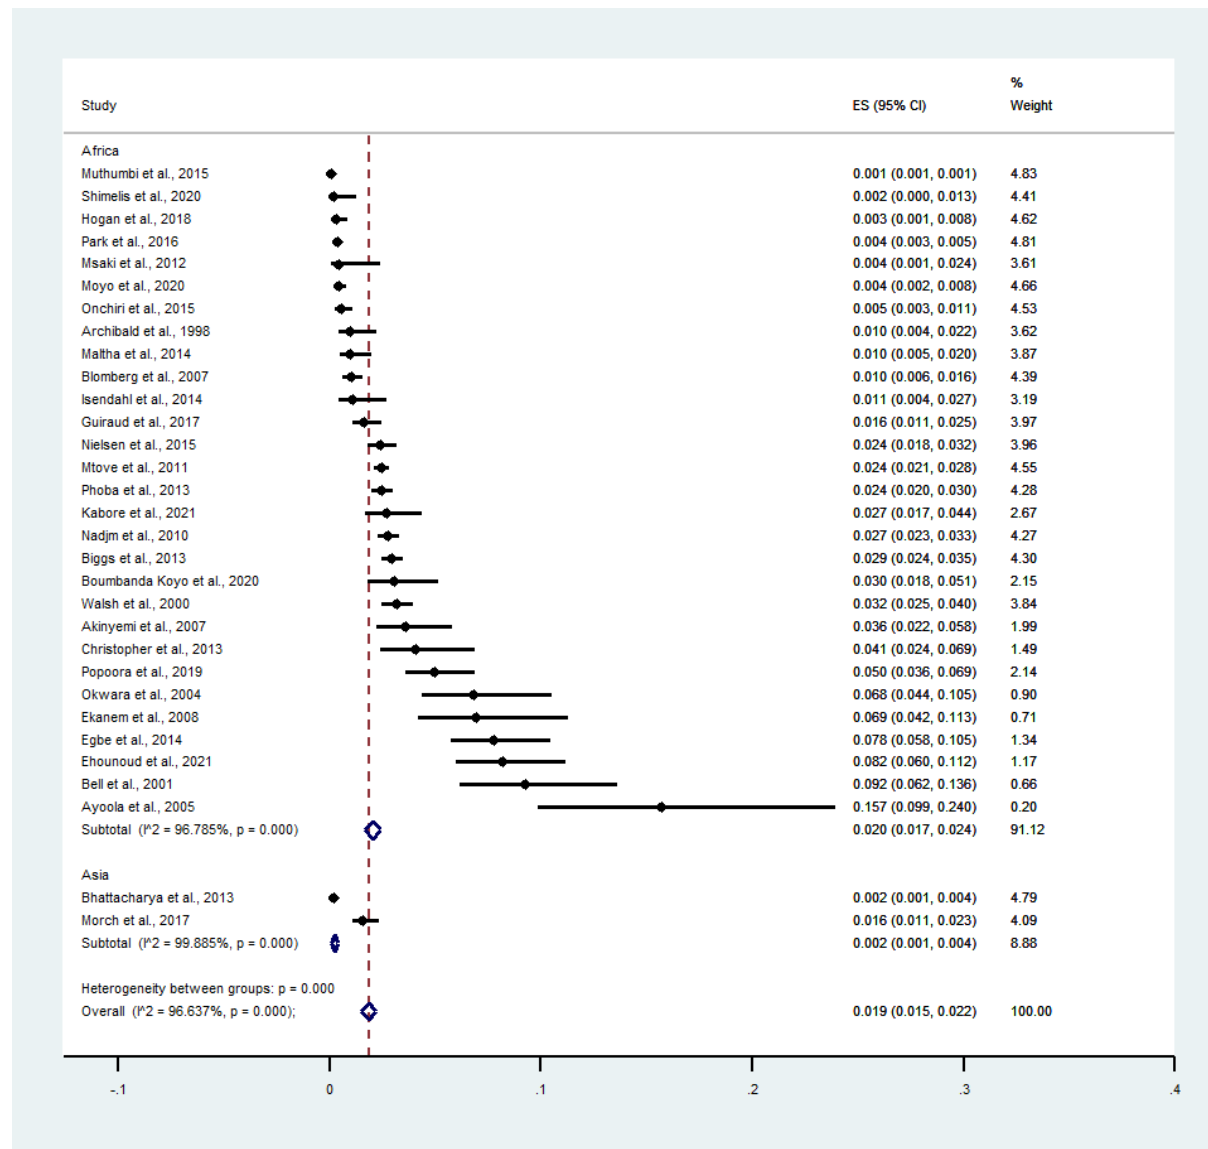

**Supplementary Figure S1.** A subgroup analysis of the pooled prevalence of malaria and bacteremia co-infection by continents. Abbreviations: ES: prevalence estimate; CI, confidence interval

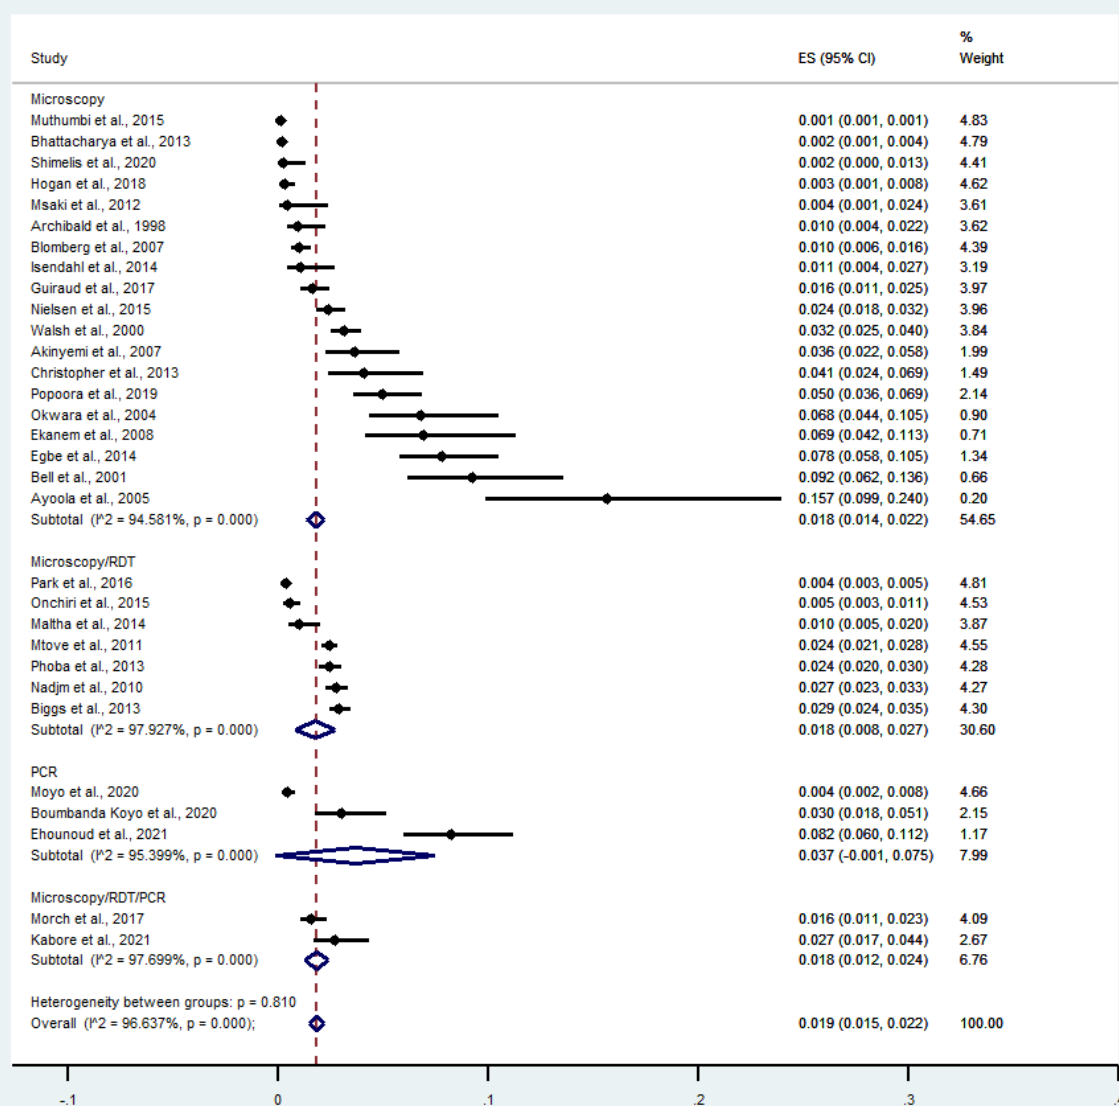

**Supplementary Figure S2.** A subgroup analysis of the pooled prevalence of malaria and bacteremia co-infection by malaria diagnostic method. Abbreviations: ES: prevalence estimate; CI, confidence interval

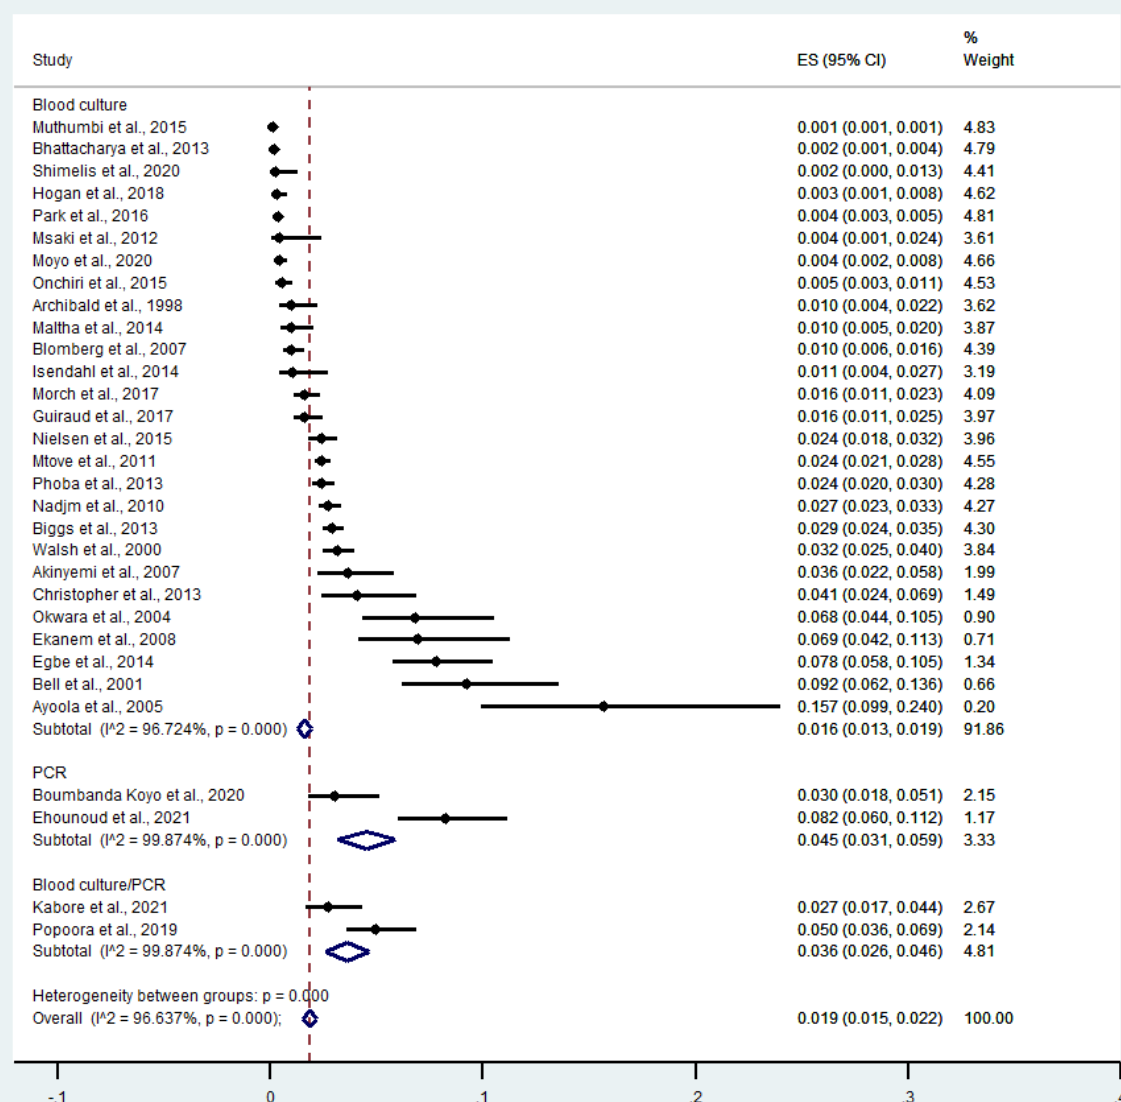

**Supplementary Figure S3.** A subgroup analysis of the pooled prevalence of malaria and bacteremia co-infection by bacteremia diagnostic method. Abbreviations: ES: prevalence estimate; CI, confidence interval

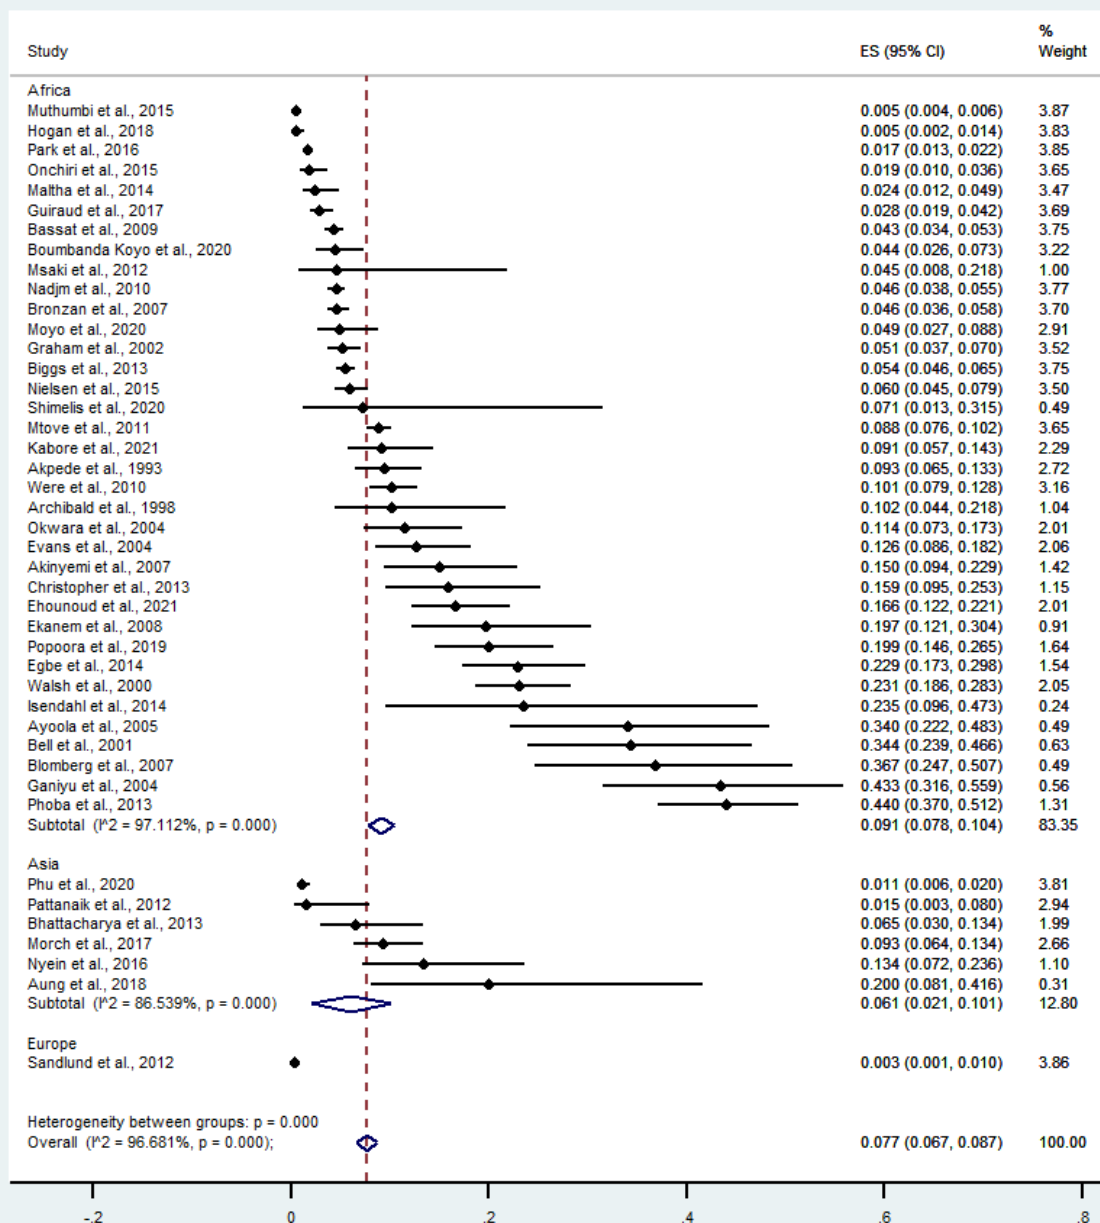

**Supplementary Figure S4.** A subgroup analysis of the pooled prevalence of bacteremia among patients with malaria by continents. Abbreviations: ES: prevalence estimate; CI, confidence interval

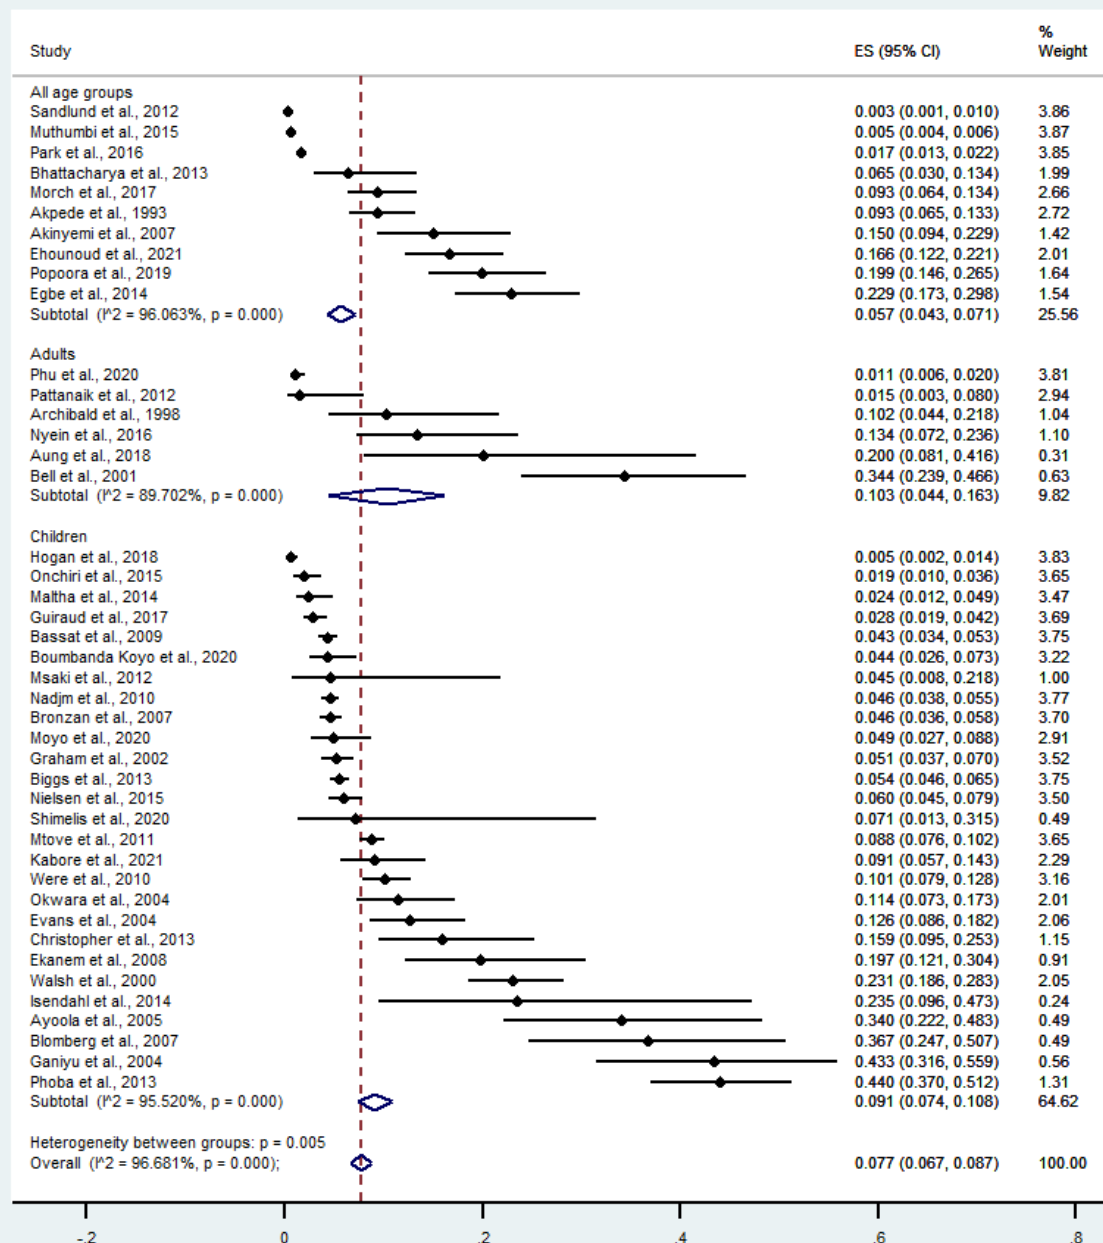

**Supplementary Figure S5.** A subgroup analysis of the pooled prevalence of bacteremia among patients with malaria by age groups. Abbreviations: ES: prevalence estimate; CI, confidence interval

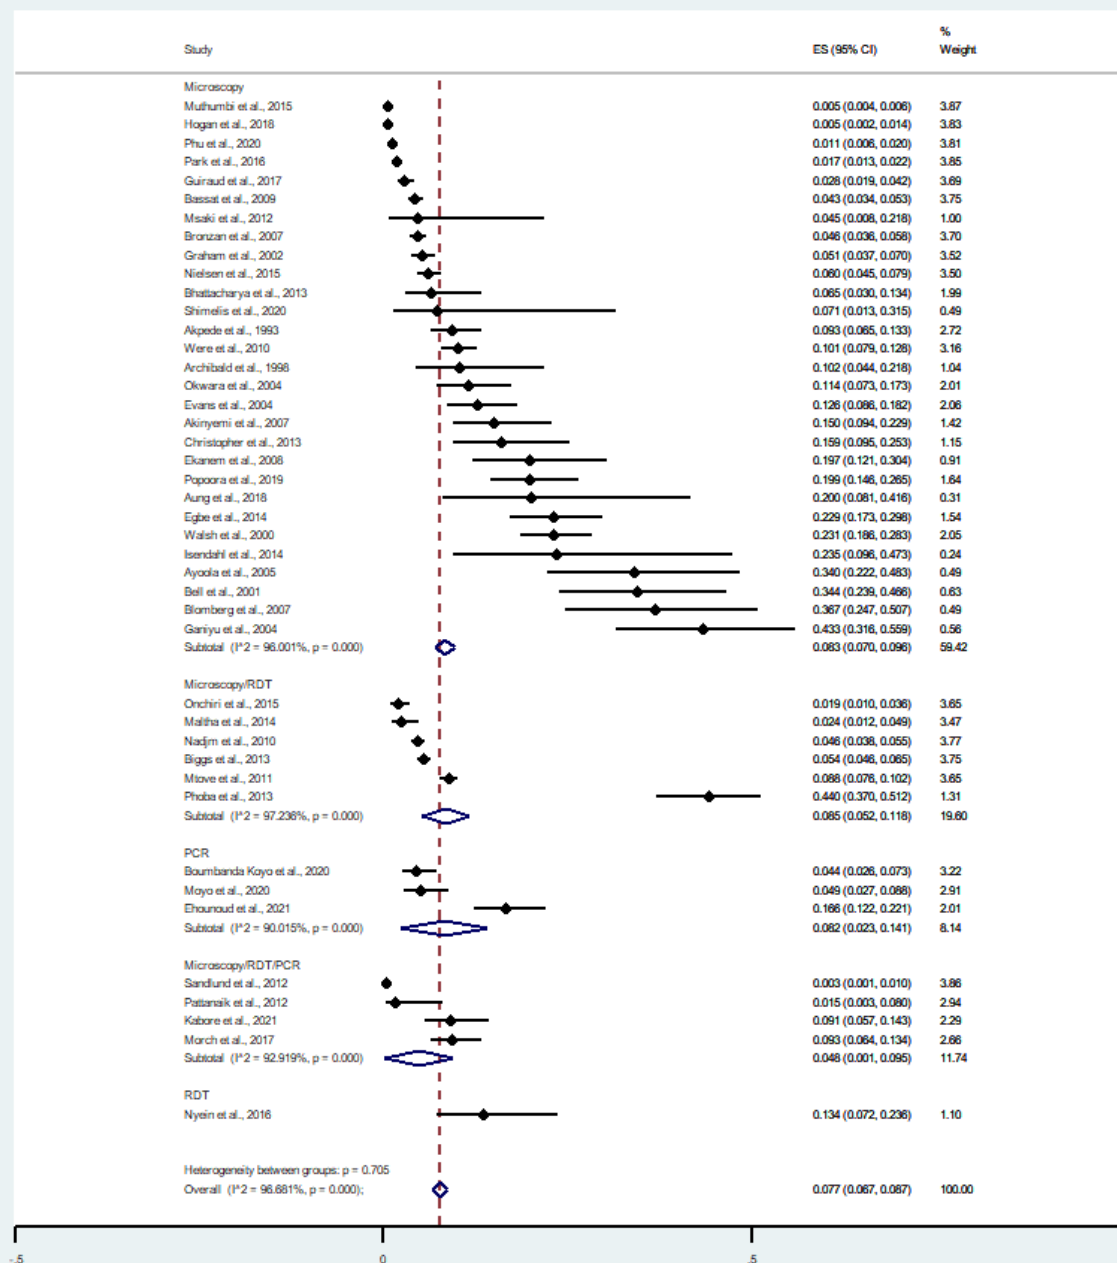

**Supplementary Figure S6.** A subgroup analysis of the pooled prevalence of bacteremia among patients with malaria by malaria diagnostic method. Abbreviations: ES: prevalence estimate; CI, confidence interval

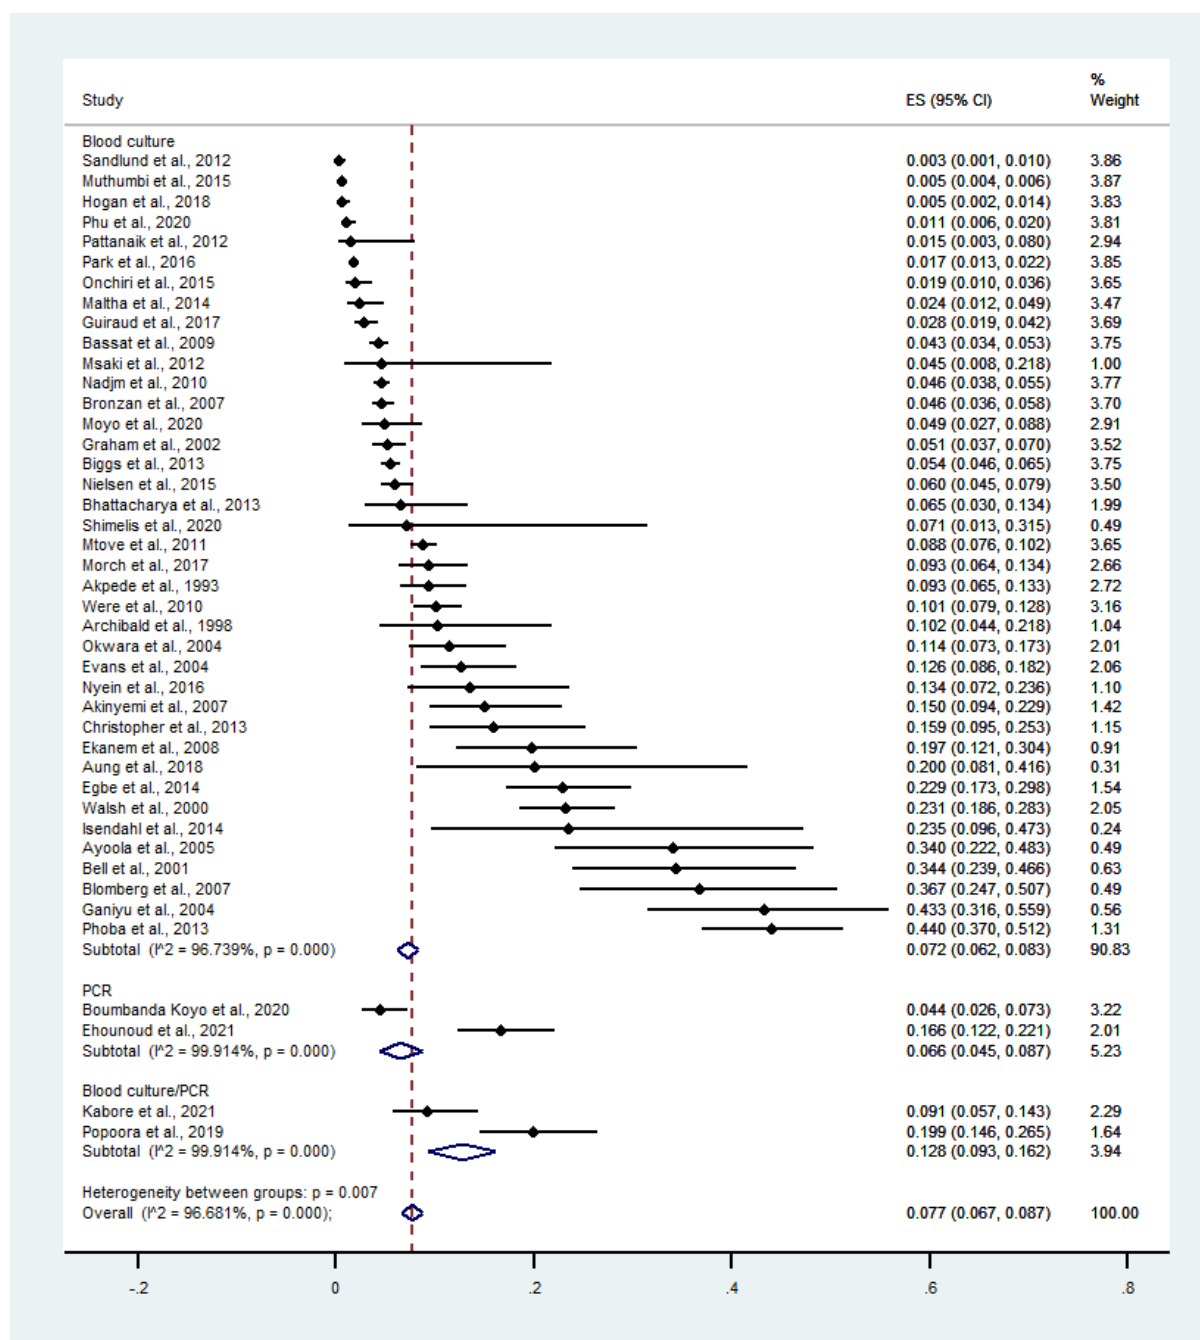

**Supplementary Figure S7.** A subgroup analysis of the pooled prevalence of bacteremia among patients with malaria by bacteremia diagnostic method. Abbreviations: ES: prevalence estimate; CI, confidence interval

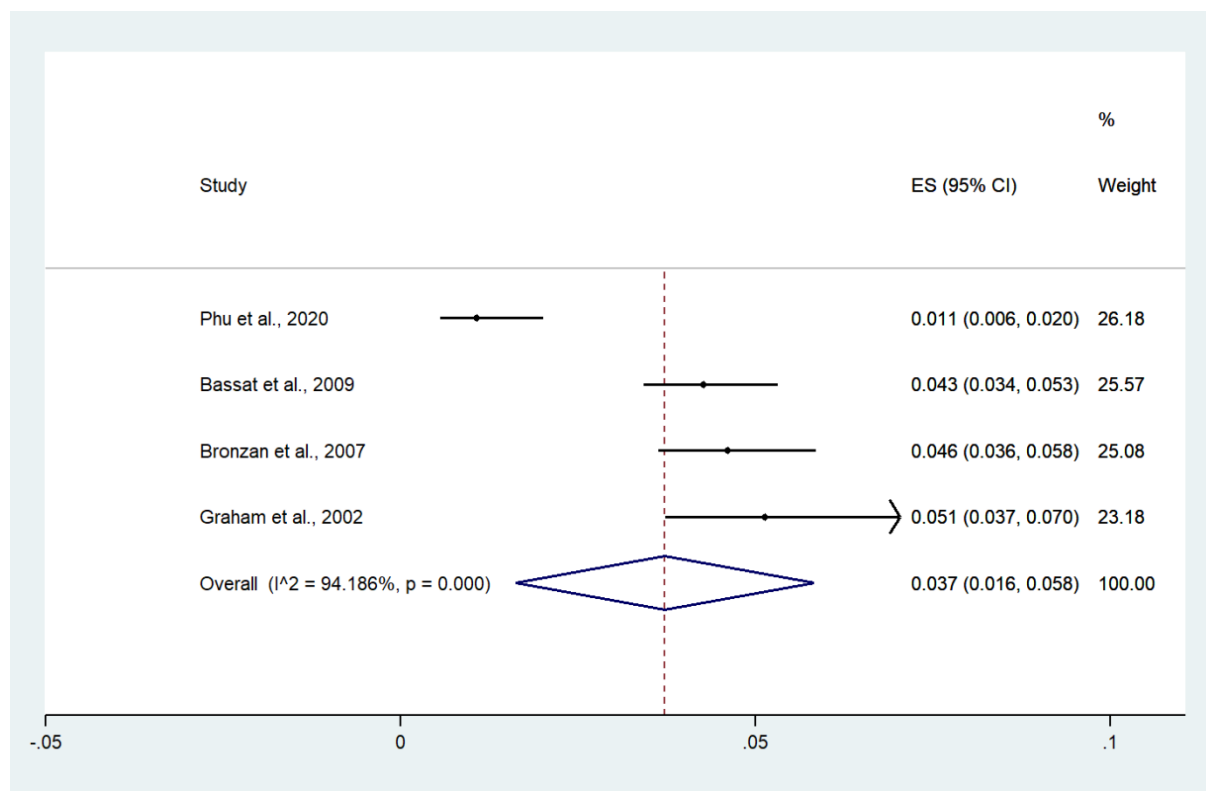

**Supplementary Figure S8.** The pooled prevalence of bacteremia among patients with severe malaria. Abbreviations: ES: prevalence estimate; CI, confidence interval



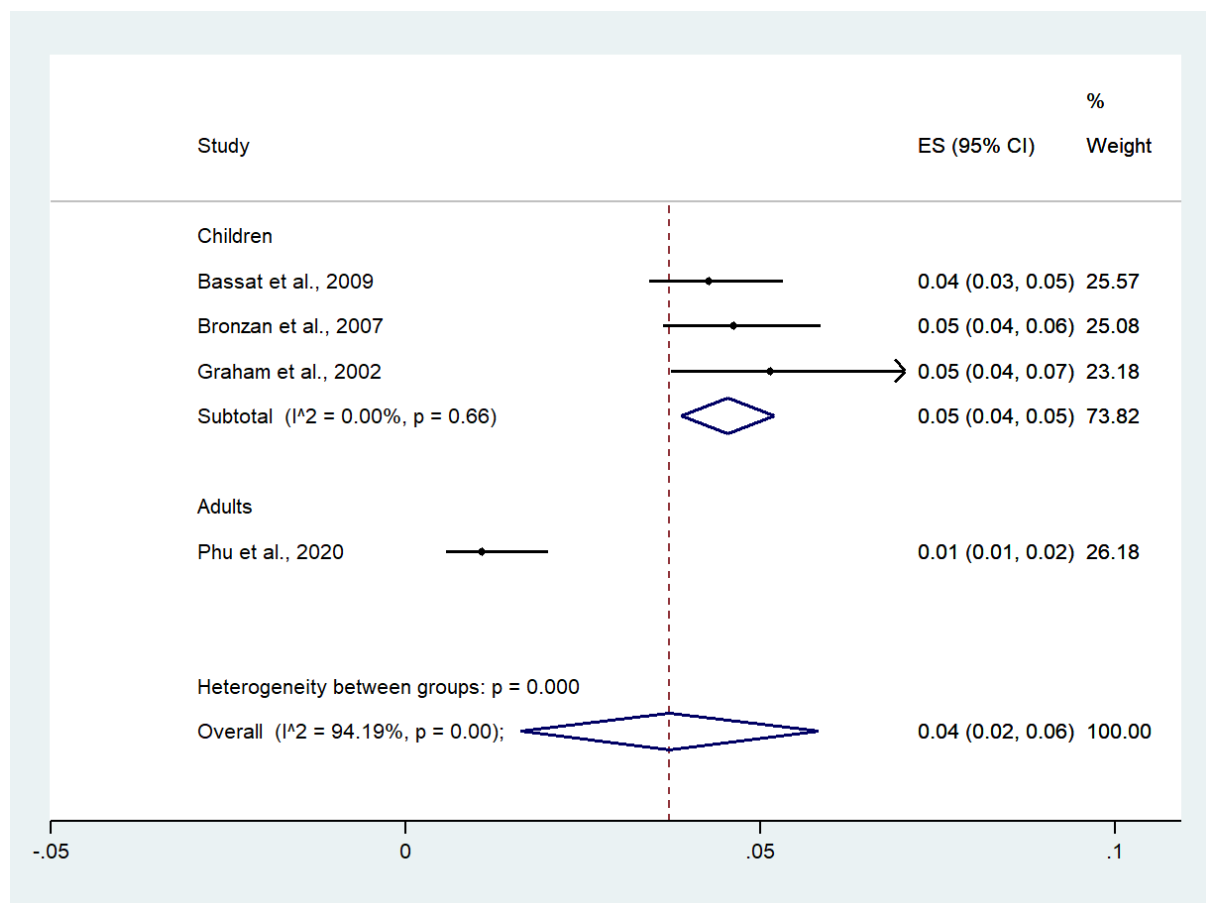

**Supplementary Figure S9.** The pooled prevalence of bacteremia among patients with severe malaria by age groups. Abbreviations: ES: prevalence estimate; CI, confidence interval

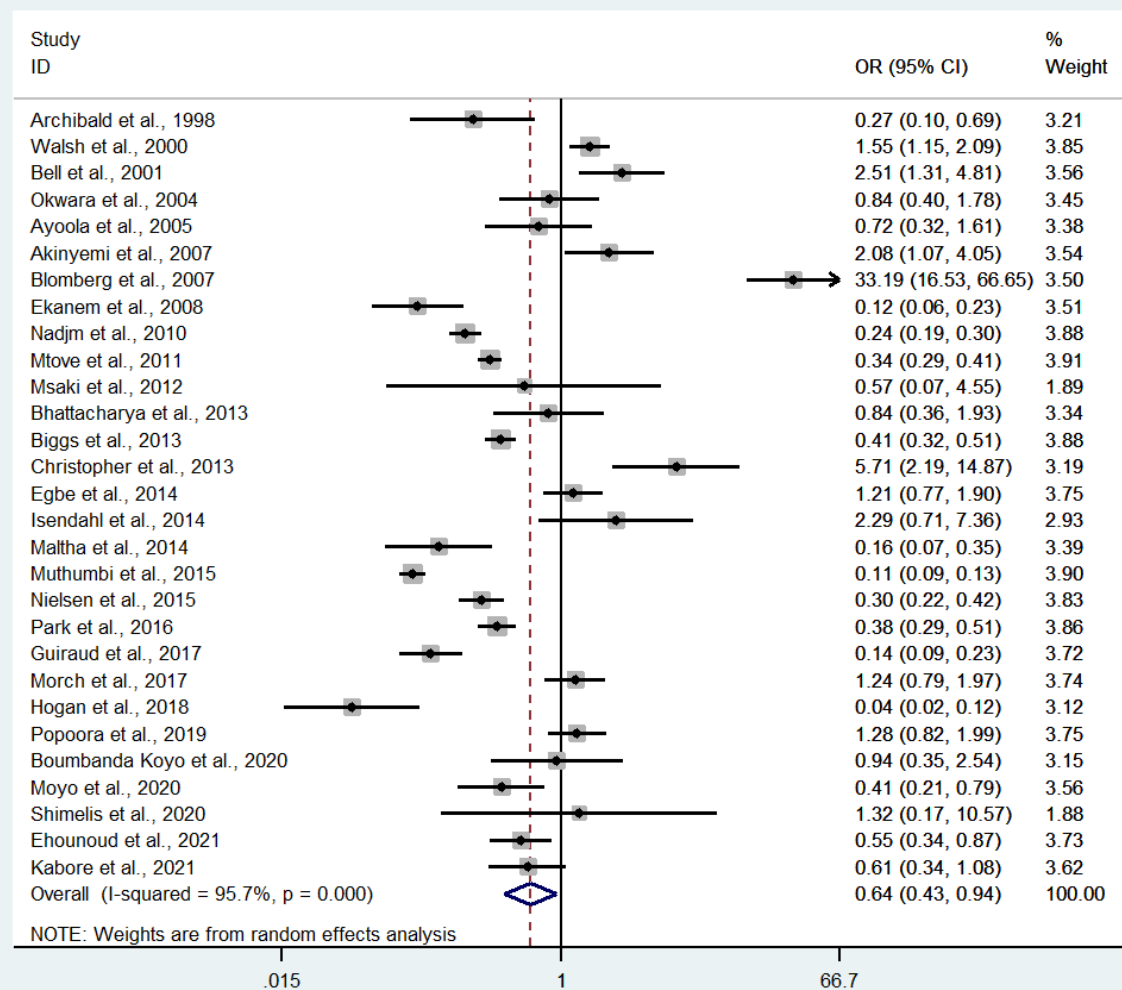

**Supplementary Figure S10.** A probability of co-infection. Abbreviations: OR: odds ratio; CI, confidence interval

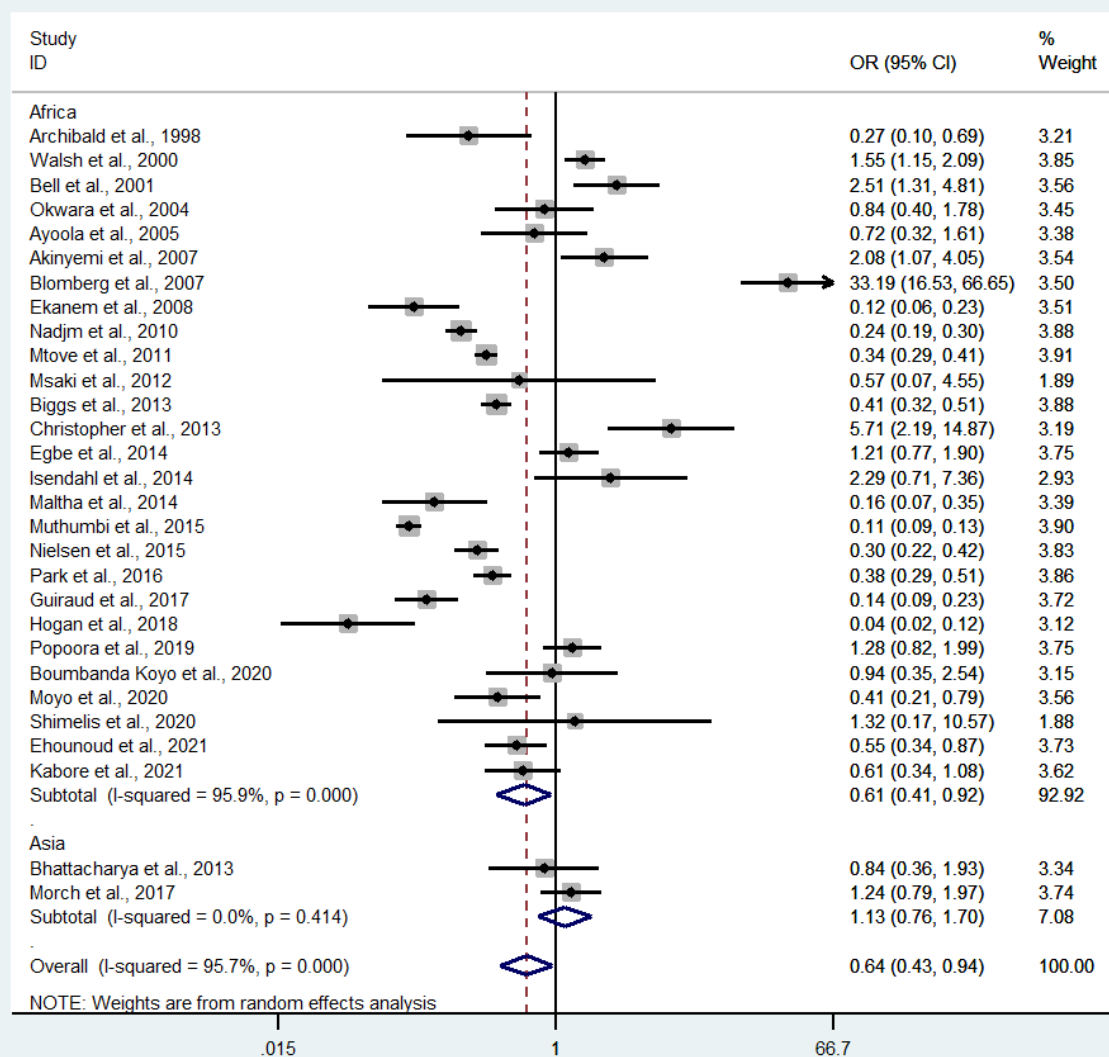

**Supplementary Figure S11.** A probability of co-infection by continents. Abbreviations: OR: odds ratio; CI, confidence interval

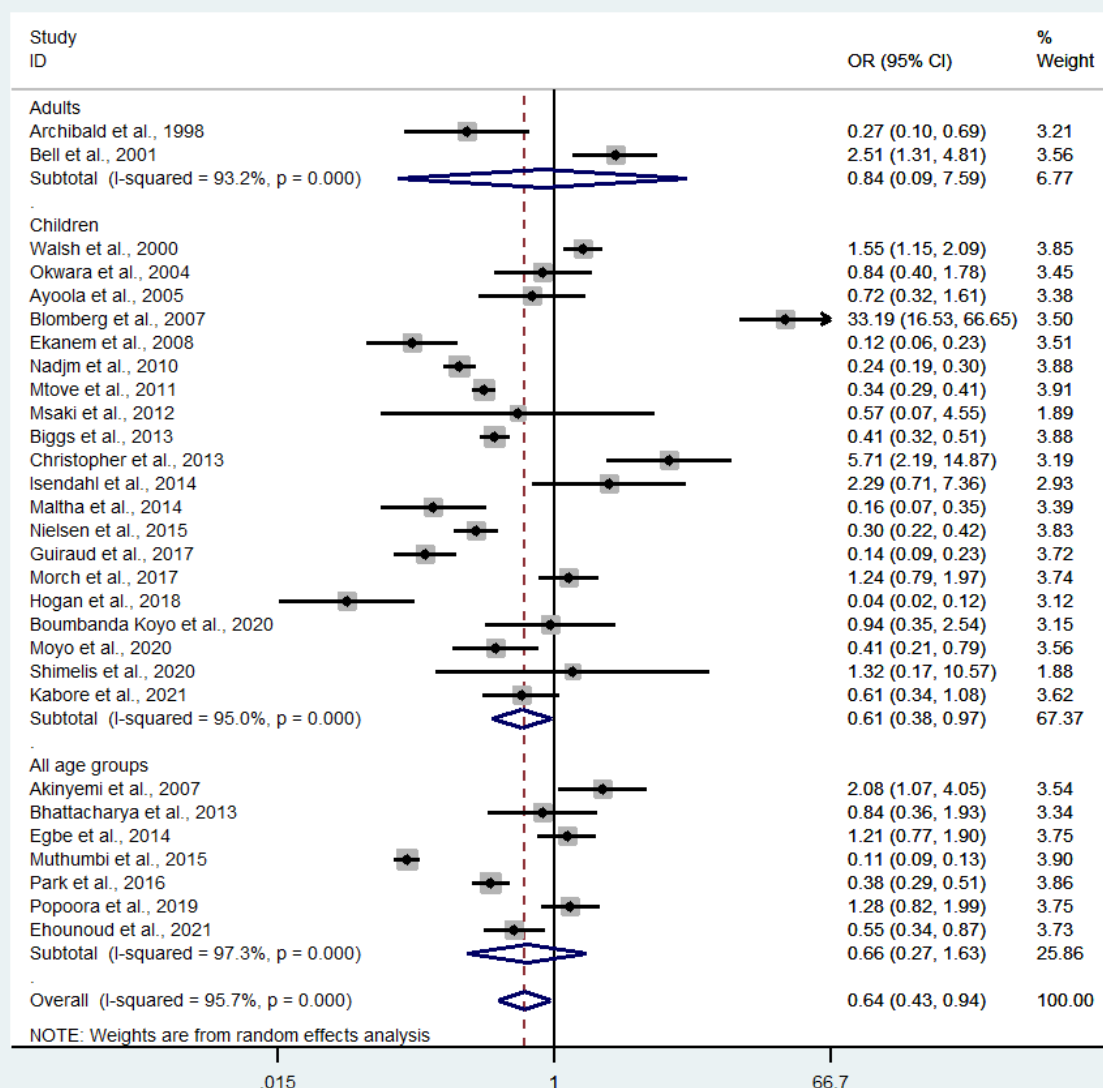

**Supplementary Figure S12.** A probability of co-infection by age groups. Abbreviations:

OR: odds ratio; CI, confidence interval

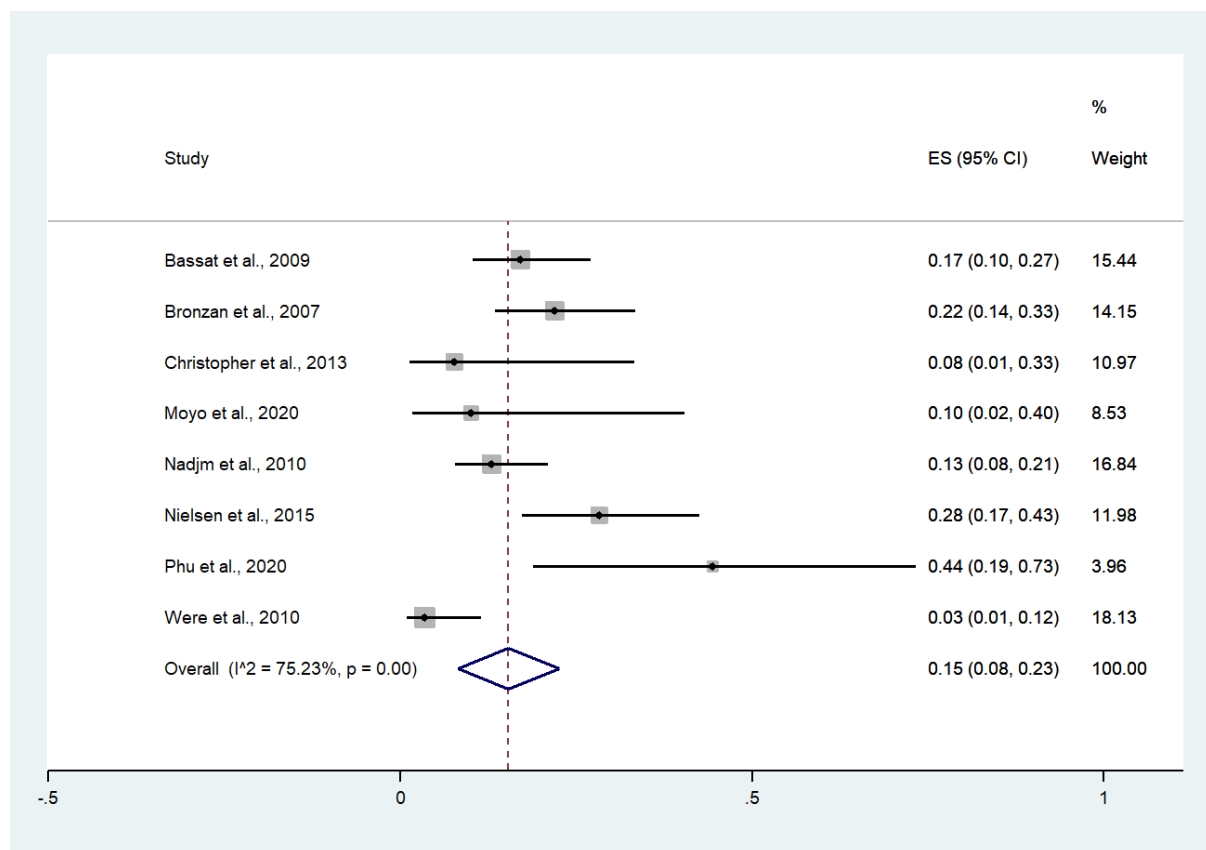

**Supplementary Figure S13.** The pooled prevalence of deaths among patients with co-infection. Abbreviations: ES: prevalence estimate; CI, confidence interval

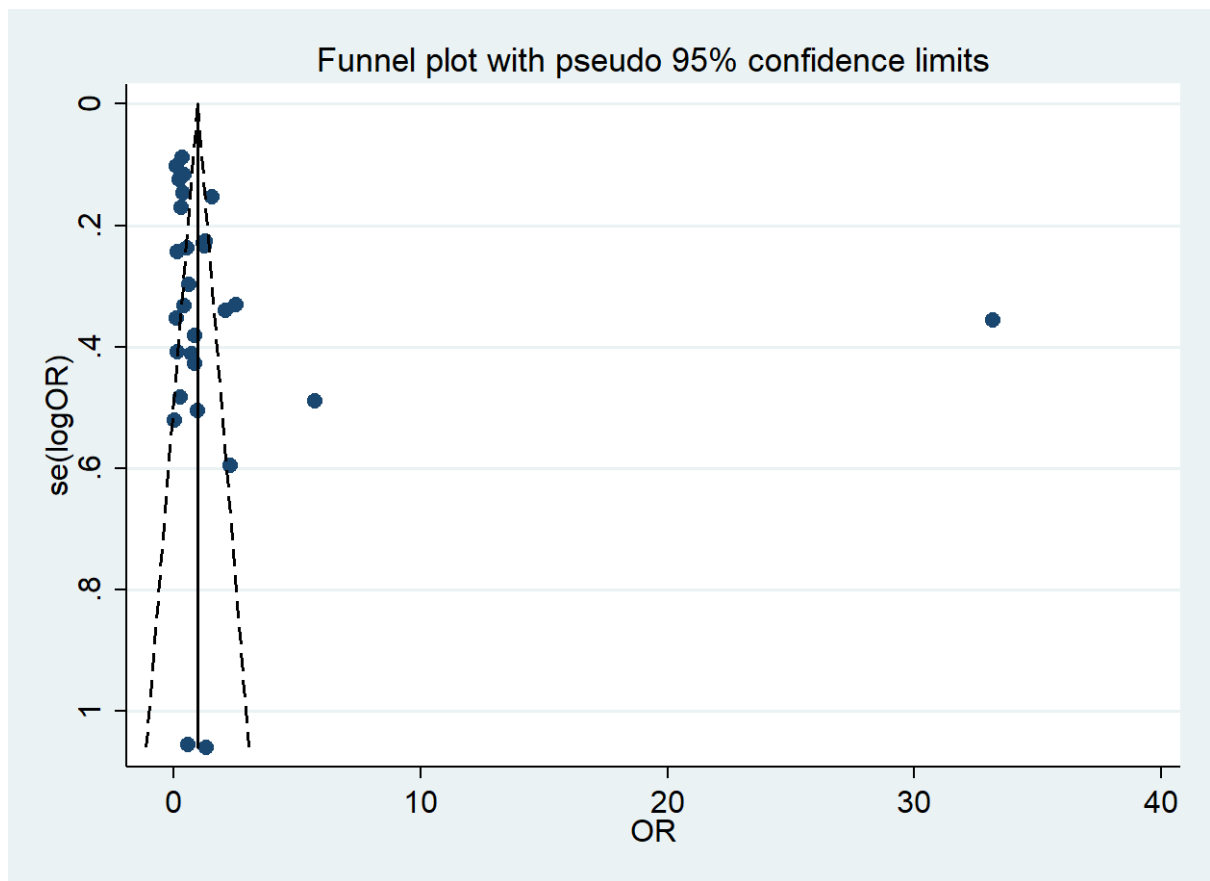

**Supplementary Figure S14.** A funnel plot of the probability of co-infection.
