# Supplementary material for: The Prevalence of Malaria and Bacteremia Co-Infections among Febrile Patients: A Systematic Review and Meta-Analysis
Source: MDPI journal article supplement (doi:10.3390/tropicalmed7090243), 2022-09-13
Supplement: s1 [file s1]

**Table S2. Details of the included studies**

| Author                    | Study site | Year conducted | Study design                    | Types of participants enrolled                                                           | Number of participants | Age range                                        | %Male         | Number of malaria and bacteremia co-infection                                                                                                                                                         | All co-infection | All malaria | All bacteremia | Malaria without bacteremia | Bacteremia without malaria | Non-malaria/bacteremia | Clinical outcomes of co-infection | Test for malaria                      | Test for bacteremia |
|---------------------------|------------|----------------|---------------------------------|------------------------------------------------------------------------------------------|------------------------|--------------------------------------------------|---------------|-------------------------------------------------------------------------------------------------------------------------------------------------------------------------------------------------------|------------------|-------------|----------------|----------------------------|----------------------------|------------------------|-----------------------------------|---------------------------------------|---------------------|
| Akinyemi et al., 2007     | Nigeria    | 2004-2005      | Cross-sectional study           | Febrile                                                                                  | 441                    | All age groups                                   | NS            | <i>Salmonella</i> (16), Without <i>Salmonella</i> (91)                                                                                                                                                | 16               | 107         | 42             | 91                         | 26                         | 308                    | NS                                | Thick-blood smear                     | Blood culture       |
| Akpede et al., 1993       | Nigeria    | 1988-1989      | Prospective observational study | Convulsion associated with fever                                                         | 386                    | All age groups                                   | NS            | <i>P. falciparum</i> + gram positive bacteria (9), <i>P. falciparum</i> + gram negative bacteria (18)                                                                                                 | 27               | 289         | 43             | 262                        | 16                         | 81                     | NS                                | Blood film examination                | Blood culture       |
| Archibald et al., 1998    | Tanzania   | 1995           | Prospective observational study | Febrile                                                                                  | 517                    | ≥15 years old                                    | 280 (54.2%)   | Malaria + Bacteremia unidentified (5)                                                                                                                                                                 | 5                | 49          | 145            | 44                         | 140                        | 328                    | NS                                | Thin-blood smear                      | Blood culture       |
| Archibald et al., 2003    | Malawi     | 1998           | Cross-sectional study           | Pediatric patients had initiated antimicrobial, antituberculous, or antimalarial therapy | 229                    | All age groups                                   | 128 (55.9%)   | Malaria + Bacteremia unidentified (2)                                                                                                                                                                 | 2                | 2           | 35             | 0                          | 33                         | 194                    | NS                                | Thick and thin-blood smear            | Blood culture       |
| Aung et al., 2018         | Myanmar    | 2016-2017      | Prospective cohort study        | Patients with falciparum malaria                                                         | 20                     | ≥ 16 years old                                   | 19 (95%)      | <i>P. falciparum</i> + <i>Escherichia coli</i> (1), <i>Salmonella typhi</i> (1), <i>Staphylococcus aureus</i> (1), mixed growth of <i>Acinetobacter baumannii</i> and <i>Enterobacter cloacae</i> (1) | 4                | 20          | 4              | 16                         | 0                          | 0                      | NS                                | thick and thin-blood film examination | Blood culture       |
| Ayoola et al., 2005       | Nigeria    | NS             | Prospective observational study | Febrile                                                                                  | 102                    | Infants aged 1 to 12 months                      | NS            | <i>P. falciparum</i> + gram positive bacteria (9), <i>P. falciparum</i> + gram negative bacteria (7)                                                                                                  | 16               | 47          | 39             | 31                         | 23                         | 32                     | Diarrhea and restlessness         | Thick and thin-blood film examination | Blood culture       |
| Bassat et al., 2009       | Mozambique | 2003-2007      | Retrospective study             | Children with severe malaria                                                             | 1780                   | Children < 5 years old                           | NS            | <i>P. falciparum</i> + <i>S. pneumoniae</i> (20), +gram negative bacteria (16), + <i>S. aureus</i> (13) and +NTS (12)                                                                                 | 76               | 1780        | 76             | 1,704                      | 0                          | 0                      | Higher case-fatality rates        | Thick and thin-blood film examination | Blood culture       |
| Bell et al., 2001         | Malawi     | 1998           | Prospective observational study | Febrile                                                                                  | 238                    | > 14 years old                                   | 101 (42.4%)   | Malaria + gram negative bacteria (21), Malaria + <i>S. pneumoniae</i> (1)                                                                                                                             | 22               | 64          | 52             | 42                         | 30                         | 144                    | NS                                | Thick-blood smear                     | Blood culture       |
| Bhattacharya et al., 2013 | India      | 2004           | Prospective observational study | Febrile                                                                                  | 3,371                  | All age groups                                   | 1,730 (51.3%) | <i>P. vivax</i> + <i>S. Typhi</i> (1), + <i>S. paratyphi</i> A (1), other gram negative bacteria (3), <i>P. vivax</i> + gram positive bacteria (1)                                                    | 6                | 93          | 256            | 87                         | 250                        | 3,028                  | Increase vivax relapses           | Thin-blood film examination           | Blood culture       |
| Biggs et al., 2013        | Tanzania   | 2006-2008      | Prospective observational study | Febrile                                                                                  | 4,106                  | 2 months to 13 years                             | 2,237 (54.5%) | Malaria ( <i>P. falciparum</i> ) + Nontyphoidal <i>Salmonella</i> (NTS) (53), recent malaria ( <i>P. falciparum</i> ) + Nontyphoidal <i>Salmonella</i> (NTS) (67)                                     | 120              | 2206        | 356            | 2086                       | 236                        | 1,664                  | NS                                | Microscopy , rapid diagnostic test    | Blood culture       |
| Blomberg et al., 2007     | Tanzania   | 2001-2002      | Prospective cohort study        | Children with signs of systemic infection                                                | 1,787                  | Children 0 to 7 years (median age of 8.5 months) | 992 (56%)     | Malaria + Bacteremia unidentified (18)                                                                                                                                                                | 18               | 49          | 62             | 21                         | 44                         | 1,704                  | Higher case-fatality rates        | Thick and thin drop blood smears      | Blood culture       |

| Author                      | Study site                                  | Year conducted | Study design                      | Types of participants enrolled              | Number of participants | Age range                          | %Male       | Number of malaria and bacteremia co-infection                                                                                                                                                                                                                                                                                                                                                                                                                                                                                                                                                                                                                          | All co-infection | All malaria | All bacteremia | Malaria without bacteremia | Bacteremia without malaria | Non-malaria/bacteremia | Clinical outcomes of co-infection | Test for malaria                      | Test for bacteremia |
|-----------------------------|---------------------------------------------|----------------|-----------------------------------|---------------------------------------------|------------------------|------------------------------------|-------------|------------------------------------------------------------------------------------------------------------------------------------------------------------------------------------------------------------------------------------------------------------------------------------------------------------------------------------------------------------------------------------------------------------------------------------------------------------------------------------------------------------------------------------------------------------------------------------------------------------------------------------------------------------------------|------------------|-------------|----------------|----------------------------|----------------------------|------------------------|-----------------------------------|---------------------------------------|---------------------|
| Boumbanda Koyo et al., 2020 | Gabon                                       | 2015-2016      | Retrospective study               | Febrile                                     | 428                    | < 15 years old                     | NS          | <i>P. falciparum</i> + <i>H. influenzae</i> , <i>S. aureus</i> , and <i>S. pneumoniae</i> (1), <i>P. falciparum</i> + <i>P. malariae</i> + <i>H. influenzae</i> (1), <i>P. falciparum</i> + <i>Rickettsia felis</i> (4), <i>P. falciparum</i> + <i>S. pneumoniae</i> (3), <i>P. falciparum</i> + <i>S. aureus</i> (3), <i>P. falciparum</i> + <i>H. influenzae</i> (1)                                                                                                                                                                                                                                                                                                 | 13               | 298         | 19             | 285                        | 6                          | 124                    | NS                                | RT-PCR, PCR                           | RT-PCR, PCR         |
| Bronzan et al., 2007        | Malawi                                      | 1996-2005      | Prospective observational study   | Children with severe malaria                | 1,388                  | Children ≥6 months old             | 710 (51.2%) | <i>P. falciparum</i> + Non-typhoidal <i>Salmonella</i> (37), + <i>Streptococcus pneumoniae</i> (7), + <i>Klebsiella</i> species (3), + <i>Acinetobacter</i> species (3), +alpha-hemolytic <i>Streptococcus</i> (2), + <i>Salmonella typhi</i> (1), + <i>Aeromonas</i> species (1), + <i>Escherichia vulneris/Proteus mirabilis</i> (1), + <i>Staphylococcus aureus</i> (1), +group D <i>Streptococcus</i> (1), +gram-negative rods (1), + <i>Haemophilus influenzae</i> type b (1), +non-typeable <i>Haemophilus influenzae</i> (1), + <i>Escherichia coli</i> (1), + <i>Campylobacter</i> species (1), + <i>Enterobacter cloacae</i> (1), and <i>enterococcus</i> (1) | 64               | 1,388       | 64             | 1,324                      | 0                          | 0                      | Higher case-fatality rates        | Blood film examination                | Blood culture       |
| Christopher et al., 2013    | Tanzania                                    | 2011-2012      | Prospective cross-sectional study | Febrile                                     | 317                    | 2 to 60 months old                 | 195 (61.5%) | Malaria +Bacteremia unidentified (13)                                                                                                                                                                                                                                                                                                                                                                                                                                                                                                                                                                                                                                  | 13               | 82          | 21             | 69                         | 7                          | 212                    | High mortality rates              | Blood slide                           | Blood culture       |
| Egbe et al., 2014           | Nigeria                                     | NS             | Cross-sectional study             | Febrile                                     | 500                    | All age groups (1 day to 84 years) | 281 (56.2%) | Malaria +Bacteremia unidentified (39)                                                                                                                                                                                                                                                                                                                                                                                                                                                                                                                                                                                                                                  | 39               | 170         | 104            | 131                        | 65                         | 265                    | NS                                | Thick-blood film examination          | Blood culture       |
| Ehounoud et al., 2021       | the Republic of Cote d'Ivoire (Ivory Coast) | 2014-2015      | Cross-sectional study             | Febrile                                     | 438                    | All age groups                     | 176 (40.3%) | <i>P. falciparum</i> + <i>P. malariae</i> + <i>S. pneumoniae</i> (1), <i>P. falciparum</i> + <i>P. ovale</i> + <i>R. felis</i> (1), <i>P. falciparum</i> + <i>P. ovale</i> + <i>S. aureus</i> (2), <i>P. falciparum</i> + <i>R. felis</i> + <i>S. aureus</i> (1), <i>P. falciparum</i> + <i>S. aureus</i> + <i>S. pneumoniae</i> (2), <i>P. ovale</i> + <i>S. aureus</i> + <i>S. enterica Typhi</i> (1), <i>P. falciparum</i> + <i>R. felis</i> (8), <i>P. falciparum</i> + <i>S. aureus</i> (10), <i>P. falciparum</i> + Non-typhoidal <i>Salmonella</i> (10)                                                                                                         | 36               | 217         | 95             | 181                        | 59                         | 162                    | NS                                | RT-PCR                                | RT-PCR              |
| Ekanem et al., 2008         | Nigeria                                     | 2000-2002      | Prospective observational study   | Neonates with features suggestive of sepsis | 202                    | Neonates ≤ 1 week old              | 112(55.4%)  | <i>P. falciparum</i> + <i>Staphylococcus aureus</i> (6), +coliform (6) and + others/unidentified (2)                                                                                                                                                                                                                                                                                                                                                                                                                                                                                                                                                                   | 14               | 71          | 103            | 57                         | 89                         | 42                     | NS                                | Thick and thin-blood film examination | Blood culture       |

| Author                 | Study site    | Year conducted | Study design                                         | Types of participants enrolled                                                   | Number of participants | Age range                          | %Male         | Number of malaria and bacteremia co-infection                                                                                                                                                                                                                                                                                                                                                                             | All co-infection | All malaria | All bacteremia | Malaria without bacteremia | Bacteremia without malaria | Non-malaria/bacteremia | Clinical outcomes of co-infection | Test for malaria                                 | Test for bacteremia |
|------------------------|---------------|----------------|------------------------------------------------------|----------------------------------------------------------------------------------|------------------------|------------------------------------|---------------|---------------------------------------------------------------------------------------------------------------------------------------------------------------------------------------------------------------------------------------------------------------------------------------------------------------------------------------------------------------------------------------------------------------------------|------------------|-------------|----------------|----------------------------|----------------------------|------------------------|-----------------------------------|--------------------------------------------------|---------------------|
| Evans et al., 2004     | Ghana         | NS             | Retrospective study /Prospective observational study | Children with severe malaria                                                     | 251                    | NS                                 | 127 (50.5%)   | <i>P. falciparum</i> +Non-typhoid <i>Salmonella</i> species (NTS) (10), + <i>Staphylococcus aureus</i> (9), + <i>Escherichia coli</i> (1), + <i>Providencia</i> (1), +Other coliforms (1), + <i>Streptococcus pneumoniae</i> (1)                                                                                                                                                                                          | 23               | 182         | 51             | 159                        | 28                         | 41                     | NS                                | Thick and thin-blood film examination            | Blood culture       |
| Ganiyu et al., 2004    | Nigeria       | NS             | Cross-sectional study                                | Children                                                                         | 147                    | 4.24 ± 2.88 years of age           | NS            | Malaria + <i>E. coli</i> (5), + <i>Proteus</i> (4), + <i>Staphylococcus</i> (16), + <i>Salmonella</i> (1)                                                                                                                                                                                                                                                                                                                 | 26               | 60          | 28             | 34                         | 2                          | 85                     | NS                                | Thick and thin-blood film examination            | Blood culture       |
| Graham et al., 2002    | Malawi        | 1996-1999      | Prospective observational study                      | Children with severe malaria                                                     | 701                    | 3-148 months                       | NS            | Malaria +NTS (18), Malaria + <i>Streptococcus pneumoniae</i> (5), + Group D <i>Streptococcus</i> (1), +alpha-haemolytic <i>Streptococcus</i> (1) and <i>Enterococcus</i> (1); +Enterobacteriaceae were <i>Enterobacter cloacae</i> (2), <i>Acinetobacter</i> (2), <i>Escherichia coli</i> (1), <i>Salmonella typhi</i> (1), and <i>Klebsiella</i> (1), + <i>Campylobacter</i> spp. (1), <i>Haemophilus influenzae</i> (1) | 36               | 701         | 36             | 665                        | 0                          | 0                      | NS                                | Thin and thick film microscopy                   | Blood culture       |
| Guiraud et al., 2017   | Burkina Faso  | 2013-2014      | Prospective cohort study                             | Febrile                                                                          | 1,339                  | 2 months-15 years old              | NS            | <i>P. falciparum</i> +iNTS (12), + <i>Salmonella Typhi</i> (3), + <i>Streptococcus pneumoniae</i> (5), + <i>Staphylococcus aureus</i> (2)                                                                                                                                                                                                                                                                                 | 22               | 777         | 118            | 755                        | 96                         | 466                    | NS                                | Thick-blood film examination                     | Blood culture       |
| Hogan et al., 2018     | Ghana         | 2013-1015      | Prospective cohort study                             | Febrile                                                                          | 1,238                  | ≥30 days and ≤15 years             | 677 (55%)     | Malaria +Bacteremia unidentified (4)                                                                                                                                                                                                                                                                                                                                                                                      | 4                | 728         | 62             | 724                        | 58                         | 452                    | NS                                | Microscopy                                       | Blood culture       |
| Ikumapayi et al., 2007 | Gambia        | 2002-2004      | Cross-sectional study                                | Children who were investigated as possible cases of invasive bacterial infection | 62                     | Children aged 2–29 months          | NS            | Malaria +Bacteremia unidentified (25)                                                                                                                                                                                                                                                                                                                                                                                     | 25               | 0           | 62             | 0                          | 37                         | 0                      | NS                                | NS                                               | Blood culture       |
| Isendahl et al., 2014  | Guinea-Bissau | 2010           | Cross-sectional study                                | Children with tachycardia and/or fever                                           | 372                    | NS (mean age was 1.7 years)        | 209 (56%)     | Malaria +Bacteremia unidentified (4)                                                                                                                                                                                                                                                                                                                                                                                      | 4                | 17          | 46             | 13                         | 42                         | 313                    | NS                                | Thin and thick smears for malaria microscopy     | Blood culture       |
| Kabore et al., 2021    | Burkina Faso  | 2013-2014      | Prospective observational study                      | febrile                                                                          | 589                    | children aged 3 months to 15 years | 350 (59%)     | <i>P. falciparum</i> +Bacteremia (16)                                                                                                                                                                                                                                                                                                                                                                                     | 16               | 175         | 75             | 159                        | 59                         | 355                    | NS                                | Microscopy , rapid diagnostic test [RDT] and PCR | Blood culture, PCR  |
| Krumkamp et al., 2016  | Ghana         | 2007-2012      | Case-control study                                   | Febrile                                                                          | 6,746                  | Children <15 years of age          | 3,661 (54.3%) | <i>P. falciparum</i> +Invasive Non-typhoidal <i>Salmonella</i> (34)                                                                                                                                                                                                                                                                                                                                                       | 34               | 2,530       | 445            | 2,479                      | 411                        | 3,822                  | NS                                | Thick-blood film examination                     | Blood culture       |

| Author                 | Study site   | Year conducted | Study design                    | Types of participants enrolled         | Number of participants | Age range                          | %Male          | Number of malaria and bacteremia co-infection                                                                                                                                                                                                                                                                                                                                                 | All co-infection | All malaria | All bacteremia | Malaria without bacteremia | Bacteremia without malaria | Non-malaria/bacteremia | Clinical outcomes of co-infection                                                                                    | Test for malaria                                                    | Test for bacteremia    |
|------------------------|--------------|----------------|---------------------------------|----------------------------------------|------------------------|------------------------------------|----------------|-----------------------------------------------------------------------------------------------------------------------------------------------------------------------------------------------------------------------------------------------------------------------------------------------------------------------------------------------------------------------------------------------|------------------|-------------|----------------|----------------------------|----------------------------|------------------------|----------------------------------------------------------------------------------------------------------------------|---------------------------------------------------------------------|------------------------|
| Lepage et al., 1987    | Rwanda       | 1984-1985      | Case-control study              | Febrile                                | 900                    | Children aged under 15 years       | NS             | <i>P. falciparum</i> +Bacteremia (30)                                                                                                                                                                                                                                                                                                                                                         | 30               | 30          | 112            | 0                          | 82                         | 788                    | NS                                                                                                                   | Thick-drop smear                                                    | Blood culture          |
| Maltha et al., 2014    | Burkina Faso | 2012-2013      | Prospective observational study | Febrile and/or signs of severe illness | 711                    | children aged under 15 years       | 393 (55.3%)    | Malaria +Bacteremia unidentified (7)                                                                                                                                                                                                                                                                                                                                                          | 7                | 292         | 63             | 285                        | 56                         | 363                    | Higher case-fatality rates                                                                                           | Thick and thin-blood film examination , rapid diagnostic test [RDT] | Blood culture          |
| Morch et al., 2017     | India        | 2011-2012      | Prospective observational study | Febrile                                | 1,564                  | ≥5 years old                       | 895 (57%)      | <i>P. falciparum</i> (12), other <i>Plasmodium</i> (13) +Bacteremia include , <i>Staphylococcus aureus</i> , <i>Salmonella typhi</i> and <i>S. paratyphi</i>                                                                                                                                                                                                                                  | 25               | 268         | 124            | 243                        | 99                         | 1,197                  | NS                                                                                                                   | Blood smear, rapid diagnostic test [RDT] and PCR                    | Blood culture          |
| Mourembou et al., 2016 | Gabon        | NS             | Case-control study              | Febrile                                | 410                    | Children under 15 years            | 212 (51.7%)    | <i>P. falciparum</i> + <i>T. whipplei</i> , <i>S. aureus</i> , and <i>S. pneumoniae</i> (1), <i>P. falciparum</i> + <i>S. aureus</i> and <i>S. pneumoniae</i> (3), <i>P. falciparum</i> + <i>S. aureus</i> , and <i>S. pyogenes</i> (1), <i>P. falciparum</i> + <i>non-typhi Salmonella</i> (3), <i>P. falciparum</i> + <i>S. aureus</i> (1), <i>P. falciparum</i> + <i>S. pneumoniae</i> (5) | 14               | 323         | 22             | 309                        | 8                          | 79                     | NS                                                                                                                   | Thick blood film, RT-PCR                                            | blood cultures, RT-PCR |
| Moyo et al., 2020      | Tanzania     | 2017-2018      | Cross-sectional study           | Febrile                                | 2,226                  | Children aged 0–5 years            | 1,299 (58%)    | <i>P. falciparum</i> + <i>Serratia marcescens</i> (2), + <i>K. pneumoniae</i> (2), + <i>E. coli</i> (1), + <i>Acinetobacter ursingii</i> (1), + <i>Alcaligenes faecalis</i> (1), + <i>Ochrobactrum tritici</i> (1), <i>E. faecium</i> (1), and <i>S. aureus</i> (1)                                                                                                                           | 10               | 204         | 236            | 194                        | 226                        | 1,796                  | 40% (4/10) had clinically severe disease and high malaria parasitaemia by qPCR, and one of these four children died. | RT-PCR                                                              | Blood culture          |
| Msaki et al., 2012     | Tanzania     | 2011           | Cross-sectional study           | Febrile                                | 231                    | Children less than 5 years of age  | 105 (45.5%)    | <i>P. falciparum</i> malaria +bacteremia (1)                                                                                                                                                                                                                                                                                                                                                  | 1                | 22          | 17             | 21                         | 16                         | 193                    | NS                                                                                                                   | Thin and thick blood smears                                         | Blood culture          |
| Mtove et al., 2011     | Tanzania     | 2006-2010      | Prospective observational study | Febrile                                | 6,836                  | Children aged 2 months to 14 years | 2,422 (46%)    | <i>P. falciparum</i> malaria +bacteremia (167)                                                                                                                                                                                                                                                                                                                                                | 167              | 1,898       | 1,248          | 1,731                      | 1,081                      | 3,857                  | NS                                                                                                                   | Thick and thin-blood film examination , rapid diagnostic test [RDT] | Blood culture          |
| Muthumbi et al., 2015  | Kenya        | 1998-2014      | Retrospective study             | Febrile or signs of focal sepsis       | 98,600                 | All age groups                     | 52,341 (53.1%) | <i>P. falciparum</i> malaria + NTS bacteremia (99)                                                                                                                                                                                                                                                                                                                                            | 99               | 18,896      | 3,814          | 18,797                     | 3,715                      | 75,989                 | NS                                                                                                                   | Thick and thin films                                                | Blood culture          |
| Nadjm et al., 2010     | Tanzania     | 2006-2007      | Prospective observational study | Febrile                                | 3,639                  | Children aged 2 months to 13 years | NS             | <i>P. falciparum</i> + NTS (52), <i>P. falciparum</i> + other bacteria (48)                                                                                                                                                                                                                                                                                                                   | 100              | 2,195       | 341            | 2,095                      | 241                        | 1,203                  | higher case-fatality rates                                                                                           | Microscopy , rapid diagnostic test [RDT]                            | Blood culture          |

| Author               | Study site                                                                                                                       | Year conducted | Study design                    | Types of participants enrolled | Number of participants | Age range                                                                  | %Male       | Number of malaria and bacteremia co-infection                                                                                                                                                                                                                                                                                                      | All co-infection | All malaria | All bacteremia | Malaria without bacteremia | Bacteremia without malaria | Non-malaria/bacteremia | Clinical outcomes of co-infection | Test for malaria                                               | Test for bacteremia |
|----------------------|----------------------------------------------------------------------------------------------------------------------------------|----------------|---------------------------------|--------------------------------|------------------------|----------------------------------------------------------------------------|-------------|----------------------------------------------------------------------------------------------------------------------------------------------------------------------------------------------------------------------------------------------------------------------------------------------------------------------------------------------------|------------------|-------------|----------------|----------------------------|----------------------------|------------------------|-----------------------------------|----------------------------------------------------------------|---------------------|
| Nielsen et al., 2015 | Ghana                                                                                                                            | 2007-2011      | Prospective observational study | severe illness                 | 1,915                  | Children under 15 years                                                    | 55%         | <i>P. falciparum</i> +NTS (21), + <i>Streptococcus</i> spp. (6), + <i>S. aureus</i> (4), + <i>S. pneumoniae</i> (3), + <i>Pseudomonas</i> spp. (3), + <i>Salmonella ser. Typhi</i> (2), + <i>Escherichia coli</i> (2), + <i>Acinetobacter</i> spp. (2), + <i>Klebsiella</i> spp. (1), + <i>Shigella</i> spp. (1) and <i>Chryseobacter</i> spp. (1) | 46               | 771         | 244            | 725                        | 198                        | 946                    | higher case-fatality rates        | Thin and thick blood smears                                    | Blood culture       |
| Nyein et al., 2016   | Myanmar                                                                                                                          | 2014-2015      | Cross-sectional study           | Adults with falciparum malaria | 67                     | Adults (NS)                                                                | 54 (80.6%)  | <i>P. falciparum</i> + <i>Escherichia coli</i> (3), + <i>Salmonella</i> Paratyphi A (2), <i>Staphylococcus aureus</i> (2), + <i>Salmonella typhi</i> (1) and + <i>Salmonella typhimurium</i> (1)                                                                                                                                                   | 9                | 67          | 9              | 58                         | 0                          | 0                      | NS                                | Rapid diagnostic test [RDT]                                    | Blood culture       |
| Okwara et al., 2004  | Kenya                                                                                                                            | 2001           | Cross-sectional study           | Febrile                        | 264                    | Children aged between three months and 12 years                            | 156 (59.1%) | <i>P. falciparum</i> +bacteremia (18)                                                                                                                                                                                                                                                                                                              | 18               | 158         | 32             | 140                        | 14                         | 92                     | NS                                | Thick-blood film examination                                   | Blood culture       |
| Onchiri et al., 2015 | Kenya                                                                                                                            | 2012-2014      | Prospective cohort study        | Febrile                        | 1,476                  | Children aged 6 months to 15 years                                         | 701 (47.5%) | Malaria+Bacteremia unidentified (8)                                                                                                                                                                                                                                                                                                                | 8                | 428         | 48             | 420                        | 40                         |                        | NS                                | Thin and thick smear microscopy, rapid diagnostic tests (RDTs) | Blood culture       |
| Park et al., 2016    | Sub-Saharan Africa (Burkina Faso, Ethiopia, Ghana, Guinea-Bissau, Kenya, Madagascar, Senegal, South Africa, Sudan, and Tanzania) | 2010-2014      | Cross-sectional study           | Febrile                        | 13,431                 | All age groups (except in Ghana, where where only children aged <15 years) | NS          | Malaria +gram-positive bacteria (22), Mararia +NTS (15), Malaria + <i>Salmonella</i> Typhi (9), Malaria + gram negative bacteria (7)                                                                                                                                                                                                               | 53               | 3,133       | 497            | 3,080                      | 444                        | 9,854                  | NS                                | Thick and thin blood smears and rapid malaria tests            | Blood culture       |

| Author                 | Study site                             | Year conducted | Study design                      | Types of participants enrolled                             | Number of participants | Age range                                          | %Male        | Number of malaria and bacteremia co-infection                                                                                                                                                                        | All co-infection | All malaria | All bacteremia | Malaria without bacteremia | Bacteremia without malaria | Non-malaria/bacteremia | Clinical outcomes of co-infection | Test for malaria                                                                                 | Test for bacteremia |
|------------------------|----------------------------------------|----------------|-----------------------------------|------------------------------------------------------------|------------------------|----------------------------------------------------|--------------|----------------------------------------------------------------------------------------------------------------------------------------------------------------------------------------------------------------------|------------------|-------------|----------------|----------------------------|----------------------------|------------------------|-----------------------------------|--------------------------------------------------------------------------------------------------|---------------------|
| Pattanaik et al., 2012 | India                                  | 2008-2009      | Prospective cohort study          | Patients categorized into severe and uncomplicated malaria | 67                     | Adults (NS)                                        | NS           | <i>P. falciparum</i> + <i>Streptococcus pyogenes</i> (1)                                                                                                                                                             | 1                | 67          | 1              | 66                         | 0                          | 0                      | NS                                | Thick and thin blood smears, rapid diagnostic test [RDT], nested polymerase chain reaction (PCR) | Blood culture       |
| Phoba et al., 2013     | Democratic Republic of the Congo (DRC) | 2011-2012      | Prospective observational study   | Febrile                                                    | 3,311                  | Children < 5 years old                             | NS           | <i>P. falciparum</i> + <i>Salmonella</i> spp. (74), <i>P. falciparum</i> + other (7)                                                                                                                                 | 81               | 184         | 114            | 103                        | 33                         |                        | NS                                | Thick and thin blood smears, rapid diagnostic test [RDT]                                         | Blood culture       |
| Phu et al., 2020       | Vietnam                                | 1991-2003      | Prospective observational study   | Adults with severe falciparum malaria                      | 845                    | Older than 14 years                                | NS           | <i>P. falciparum</i> +S. Typhi (3), +non-typhoid <i>Salmonella</i> (1), + <i>Staphylococcus aureus</i> (2), +Group A <i>Streptococcus</i> (1), <i>H. influenzae</i> type b (1), and <i>Klebsiella pneumoniae</i> (1) | 9                | 845         | 9              | 836                        | 0                          | 0                      | Higher case-fatality rates        | Thin- and thick-film malaria parasite counts                                                     | Blood culture       |
| Popoora et al., 2019   | Nigeria                                | 2017           | Cross-sectional study             | Febrile                                                    | 682                    | All age groups                                     | 332 (48.7)   | <i>P. falciparum</i> +S. Typhi (6), +non-typhoid <i>Salmonella</i> (1), + <i>Staphylococcus aureus</i> (24), + <i>Klebsiella pneumoniae</i> (1), + <i>Citrobacter koseri</i> (1) and <i>Enterobacter cloacae</i> (1) | 34               | 171         | 117            | 137                        | 83                         | 428                    | NS                                | Microscopy of thin and thick films                                                               | blood cultures, PCR |
| Sandlund et al., 2012  | Sweden                                 | 1995-2009      | Retrospective study               | travelers diagnosed with malaria                           | 755                    | All age groups                                     | NS           | <i>P. falciparum</i> + <i>Salmonella enterica</i> serovar Enteritidis (1), <i>Plasmodium</i> spp. + <i>Escherichia coli</i> (1)                                                                                      | 2                | 755         | 2              | 753                        | 0                          | 0                      | NS                                | Thick and thin blood smears, rapid diagnostic test [RDT], PCR                                    | Blood culture       |
| Shimelis et al., 2020  | Ethiopia                               | 2018-2019      | Prospective cross-sectional study | Febrile                                                    | 433                    | Children aged at least 2 months and under 13 years | 255 (58.9%)  | Malaria +Bacteremia unidentified (1)                                                                                                                                                                                 | 1                | 14          | 24             | 13                         | 23                         | 396                    | NS                                | Thick and thin blood smear slides                                                                | Blood culture       |
| Sothmann et al., 2015  | Ghana                                  | 2012           | Case-Control Study                | Febrile                                                    | 2,306                  | Children below 15 years of age                     | 1235 (53.6%) | Malaria +Bacteremia unidentified (16)                                                                                                                                                                                | 16               | 866         | 72             | 850                        | 56                         | 1,384                  | NS                                | Thin and thick blood slides                                                                      | Blood culture       |
| Thriemer et al., 2012  | Tanzania                               | 2009-2010      | Case-Control Study                | Febrile                                                    | 2,209                  | Above the age of 2 months                          | NS           | <i>P. falciparum</i> + bacteremia (1)                                                                                                                                                                                | 1                | 29          | 166            | 28                         | 165                        | 2,015                  | NS                                | Thin and thick blood films                                                                       | Blood culture       |

| Author             | Study site | Year conducted | Study design                    | Types of participants enrolled                   | Number of participants | Age range                         | %Male       | Number of malaria and bacteremia co-infection                                                                                                                                                | All co-infection | All malaria | All bacteremia | Malaria without bacteremia | Bacteremia without malaria | Non-malaria/bacteremia | Clinical outcomes of co-infection                    | Test for malaria              | Test for bacteremia |
|--------------------|------------|----------------|---------------------------------|--------------------------------------------------|------------------------|-----------------------------------|-------------|----------------------------------------------------------------------------------------------------------------------------------------------------------------------------------------------|------------------|-------------|----------------|----------------------------|----------------------------|------------------------|------------------------------------------------------|-------------------------------|---------------------|
| Ukaga et al., 2006 | Nigeria    | NS             | Case-Control Study              | Malaria positive and apparently healthy patients | 185                    | All age groups                    | NS          | <i>Staphylococcus aureus</i> 4 (3.2%), <i>Escherichia coli</i> 3 (2.4%) <i>Salmonella typhi</i> 25 (20%), <i>Klebsiella pneumoniae</i> 10 (2.4%) and <i>Pseudomonas aeruginosa</i> 2 (1.6%). | 44               | 125         | 44             | 81                         | 0                          | 60                     | Persistence of malaria-like symptoms after treatment | Thick and thin blood smears s | Blood culture       |
| Walsh et al., 2000 | Malawi     | 1996-1997      | Prospective observational study | Febrile                                          | 2,123                  | Neonate or child >2 months of age | NS          | <i>P. falciparum</i> + bacteremia (67)                                                                                                                                                       | 67               | 290         | 365            | 223                        | 298                        | 1,535                  | Splenomegaly and anemia                              | Blood film examination        | Blood culture       |
| Were et al., 2010  | Kenya      | 2004-2006      | Prospective cohort study        | <i>P. falciparum</i> malaria                     | 585                    | Aged 1 to 36 months               | 295 (50.4%) | <i>P. falciparum</i> + gram positive bacteria (22), + gram-negative bacteria (37)                                                                                                            | 59               | 585         | 59             | 526                        | 0                          | 0                      | Higher case-fatality rates                           | Thick and thin blood films    | Blood culture       |
