# Supplementary material for: The Prevalence of Malaria and Bacteremia Co-Infections among Febrile Patients: A Systematic Review and Meta-Analysis
Source: MDPI journal article supplement (doi:10.3390/tropicalmed7090243), 2022-09-13
Supplement: s1 [file s1]

**Table S1.** Search terms

| <b>Databases</b> | <b>Search terms/Search strategy</b>                                                                         | <b>Date</b>          |
|------------------|-------------------------------------------------------------------------------------------------------------|----------------------|
| MEDLINE          | (malaria OR plasmodium) AND (bacteremia)<br>Search results: 288                                             | 13 September<br>2021 |
| Scopus           | (malaria OR plasmodium) AND (bacteremia)<br>Search option: Title, abstract, keywords<br>Search results: 417 | 13 September<br>2021 |
| Web of Science   | (malaria OR plasmodium) AND (bacteremia)<br>Search option: All fields<br>Search results: 337                | 13 September<br>2021 |
