# Supplementary material for: The Prevalence of Malaria and Bacteremia Co-Infections among Febrile Patients: A Systematic Review and Meta-Analysis
Source: Trop Med Infect Dis. 2022 Sep 13;7(9):243. doi: 10.3390/tropicalmed7090243 (PMC9503679; doi:10.3390/tropicalmed7090243)
Supplement: Supplementary file 1 [file tropicalmed-07-00243-s001.zip]

Archive with 4 entries (4 files):
- Supplementary figures.pdf
- Table S1. Search terms.pdf
- Table S2. Details of the included studies.pdf
- Table S3. Quality of included studies.xlsx
